# Supplementary material
Source: publisher figshare collection journal article supplement (https://acs.figshare.com/ndownloader/files/4060144)
Supplement: Supplementary file 1 [file 4060144]

## Supporting Information

# Design of Hybrid Lipid/Retroviral-Like Particle Gene Delivery Vectors

Rahul K. Keswani<sup>1</sup>, Ian M. Pozdol<sup>1</sup> and Daniel W. Pack<sup>1,2,\*†</sup>

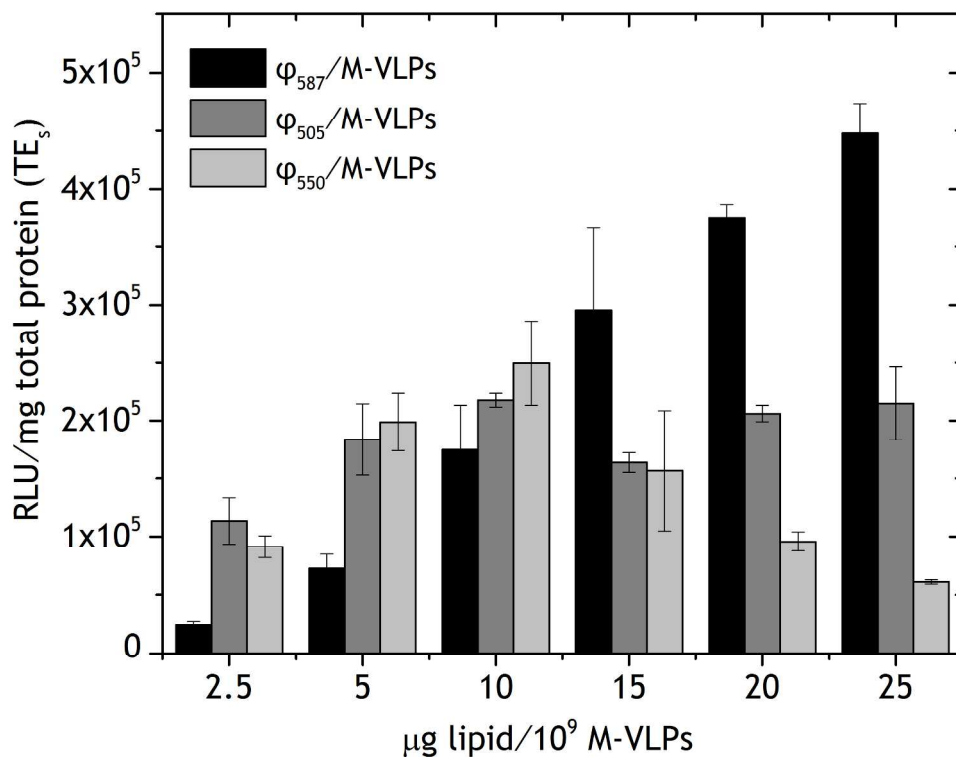

**Figure S1:** Transfection efficiency of  $\phi_{587}$ /M-VLP,  $\phi_{505}$ /M-VLP and  $\phi_{550}$ /M-VLP in KB cells with  $2 \times 10^9$  M-VLP/well of a 12- well tissue culture plate. Vectors were formed using M-VLP density of  $5.1 \times 10^9$  particles/ml and lipid:M-VLP ratios of 2.5-25  $\mu\text{g}/10^9$  M-VLP. RLU/mg total protein = relative light units per mg of total protein in cellular lysate. Error bars indicate standard deviation (n=3).

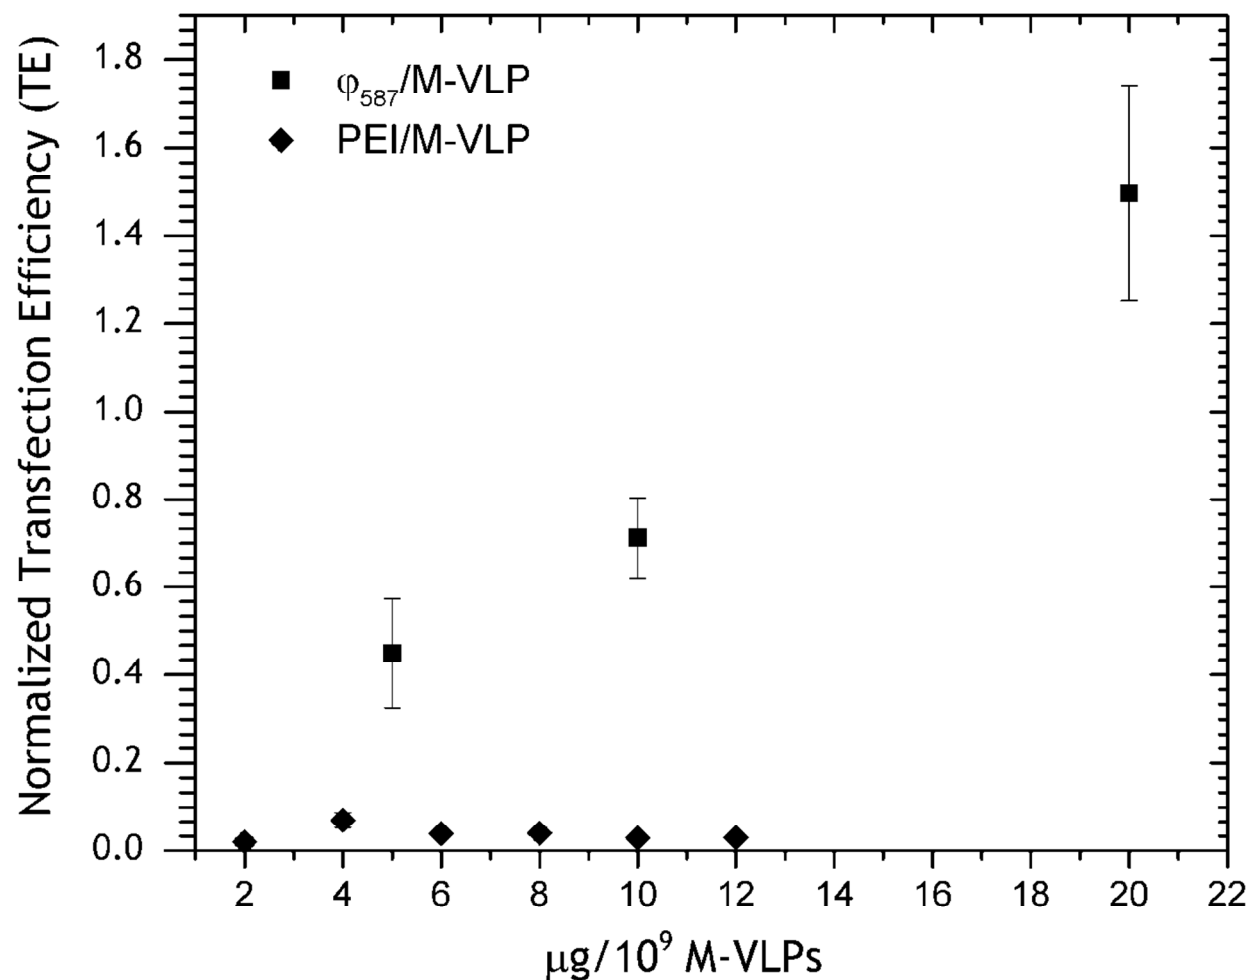

**Figure S2:** Transfection of HEK293 cells with  $\phi_{587}$ /M-VLP and PEI/M-VLP at  $1 \times 10^9$  M-VLP/well of a 12- well tissue culture plate. Vectors were formed using M-VLP density of  $10 \times 10^9$  particles/ml and at lipid:M-VLP ratios of 2-20  $\mu\text{g}/10^9$  M-VLP. Normalized transfection efficiency represents RLU/mg total protein (relative light units per mg of total protein in cellular lysate) normalized to amphotropic murine leukemia viruses ( $11 \times 10^9$  MLV-A/well). Error bars indicate standard deviation (n=3).

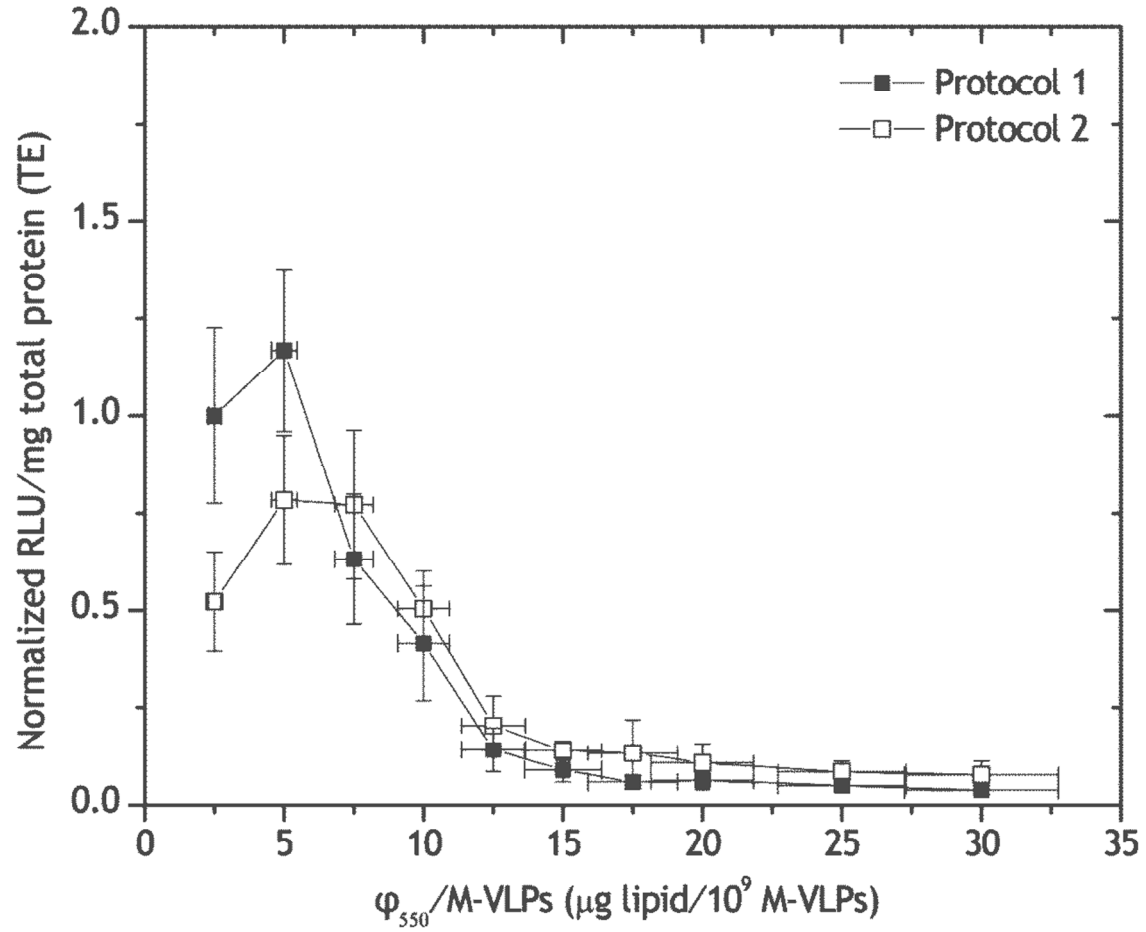

**Figure S3:** Transfection of HEK293 cells with  $\phi_{550}$ /M-VLP formed via protocol 2 at  $1 \times 10^9$  M-VLP/well of a 12-well tissue culture plate. Normalized RLU/mg total protein = relative light units per mg of total protein in cellular lysate normalized to the same measurement at a lipid stoichiometry of  $2.5 \mu\text{g}/10^9$  M-VLP of  $\phi_{550}$ /M-VLP formed via protocol 1. Error bars indicate standard deviation (n=3).

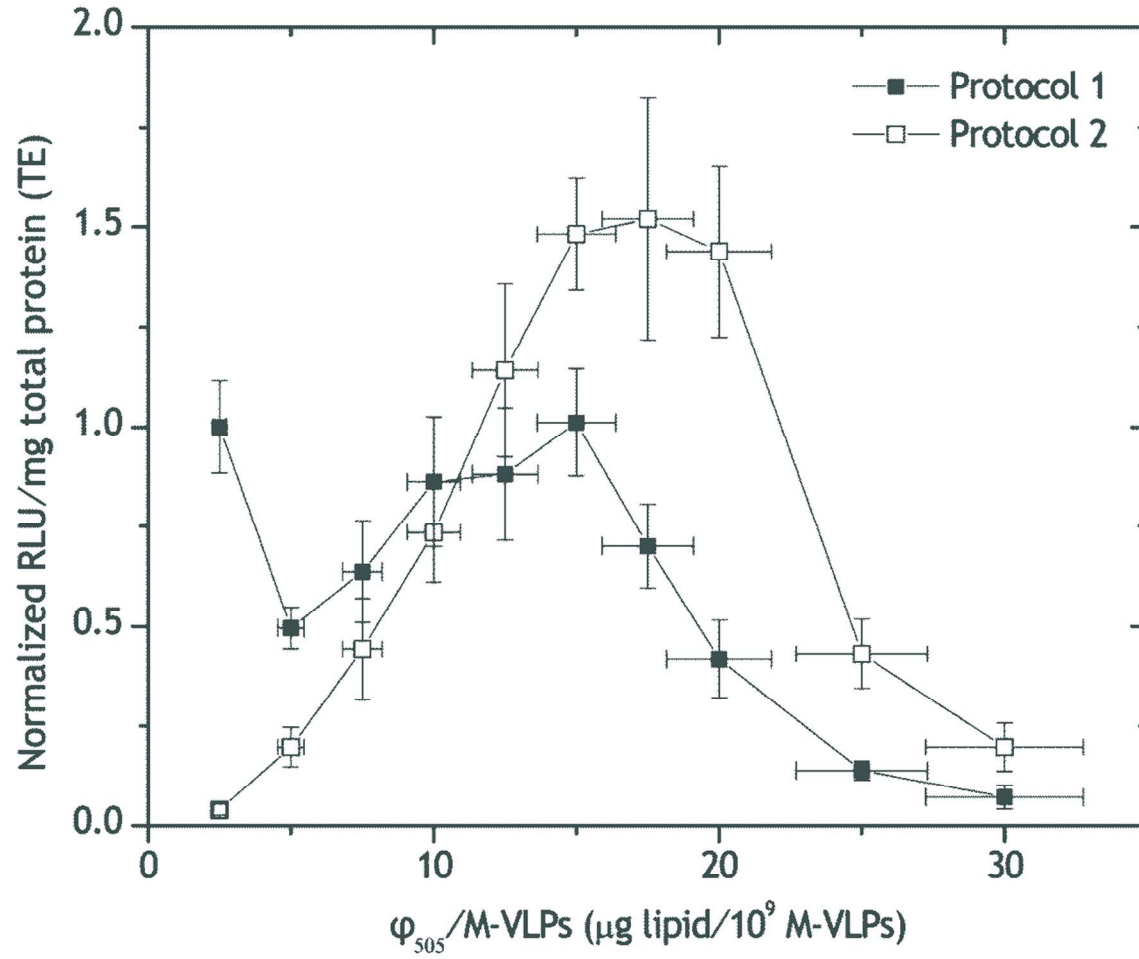

**Figure S4:** Transfection of HEK293 cells with  $\phi_{505}$ /M-VLP formed via protocol 2 at  $1 \times 10^9$  M-VLP/well of a 12-well tissue culture plate. Normalized RLU/mg total protein = relative light units per mg of total protein in cellular lysate normalized to the same measurement at a lipid stoichiometry of  $2.5 \mu\text{g}/10^9$  M-VLP of  $\phi_{505}$ /M-VLP formed via protocol 1. Error bars indicate standard deviation (n=3).

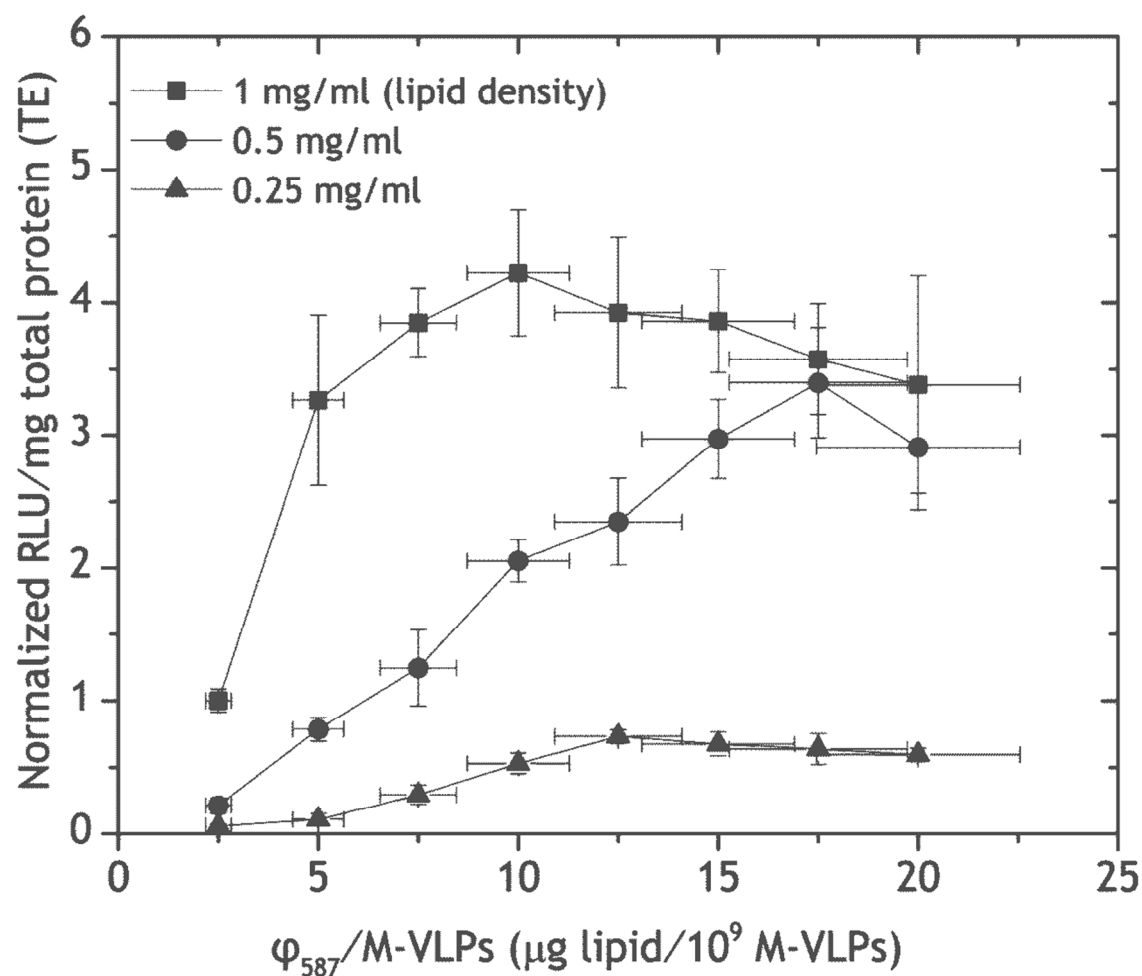

**Figure S5:** Transfection of HEK293 cells with  $\phi_{587}$ /M-VLP formed by associating M-VLP with liposomes at concentrations of 1, 0.5 and 0.25 mg/ml via protocol 2 using M-VLP density of  $16.4 \times 10^9$  particles/ml with  $1 \times 10^9$  M-VLP/well of a 12-well tissue culture plate. RLU/mg total protein = relative light units per mg total protein in cell lysate normalized to the same measurement at a lipid stoichiometry of  $2.5 \mu\text{g}/10^9$  M-VLP for  $\phi_{587}$ /M-VLP formed using a lipid concentration of 1 mg/ml. Error bars indicate standard deviation ( $n=3$ ).

**Table S1:** Sizes, measured via dynamic light scattering, and zeta potential, via ZetaPALS, of  $\phi_{587}$ /M-VLP,  $\phi_{505}$ /M-VLP and  $\phi_{550}$ /M-VLP formed via Protocol 2 at three different stoichiometries using liposomes at three different concentrations of 1, 0.5 and 0.25 mg/ml. Mean  $\pm$  SEM (n=2). The size of M-VLP without addition of any lipid was  $101 \pm 2$  nm and the zeta potential was  $-6.8 \pm 1.2$  mV.

| Size (nm)                        |             |                                                |              |                |
|----------------------------------|-------------|------------------------------------------------|--------------|----------------|
| Type                             | Only Lipid  | Lipid/M-VLP ratios ( $\mu\text{g}/10^9$ M-VLP) |              |                |
|                                  |             | 5                                              | 10           | 20             |
| $\phi_{587}$ /M-VLP (1 mg/ml)    | $144 \pm 6$ | $336 \pm 12$                                   | $443 \pm 21$ | $921 \pm 204$  |
| $\phi_{505}$ /M-VLP (1 mg/ml)    | $139 \pm 2$ | $327 \pm 21$                                   | $286 \pm 7$  | $456 \pm 25$   |
| $\phi_{550}$ /M-VLP (1 mg/ml)    | $119 \pm 4$ | $364 \pm 14$                                   | $372 \pm 12$ | $2604 \pm 292$ |
| $\phi_{587}$ /M-VLP (0.5 mg/ml)  |             | $315 \pm 12$                                   | $364 \pm 14$ | $1196 \pm 354$ |
| $\phi_{505}$ /M-VLP (0.5 mg/ml)  |             | $246 \pm 7$                                    | $197 \pm 29$ | $350 \pm 10$   |
| $\phi_{550}$ /M-VLP (0.5 mg/ml)  |             | $240 \pm 6$                                    | $350 \pm 18$ | $2275 \pm 176$ |
| $\phi_{587}$ /M-VLP (0.25 mg/ml) |             | $242 \pm 7$                                    | $323 \pm 12$ | $634 \pm 94$   |
| $\phi_{505}$ /M-VLP (0.25 mg/ml) |             | $224 \pm 7$                                    | $218 \pm 6$  | $317 \pm 25$   |
| $\phi_{550}$ /M-VLP (0.25 mg/ml) |             | $226 \pm 6$                                    | $285 \pm 14$ | $1986 \pm 354$ |

| Zeta Potential (mV)              |                |                                                |                |                |
|----------------------------------|----------------|------------------------------------------------|----------------|----------------|
| Type                             | Only Lipid     | Lipid/M-VLP ratios ( $\mu\text{g}/10^9$ M-VLP) |                |                |
|                                  |                | 5                                              | 10             | 20             |
| $\phi_{587}$ /M-VLP (1 mg/ml)    | $5.08 \pm 1.9$ | $-2.1 \pm 2.7$                                 | $5.7 \pm 1.7$  | $20.3 \pm 1.2$ |
| $\phi_{505}$ /M-VLP (1 mg/ml)    | $10.6 \pm 2.3$ | $-1.2 \pm 2.0$                                 | $4.3 \pm 2.3$  | $11.0 \pm 1.4$ |
| $\phi_{550}$ /M-VLP (1 mg/ml)    | $2.7 \pm 2.1$  | $-1.7 \pm 1.7$                                 | $15.9 \pm 1.4$ | $9.1 \pm 2.1$  |
| $\phi_{587}$ /M-VLP (0.5 mg/ml)  |                | $-7.4 \pm 2.2$                                 | $7.2 \pm 1.7$  | $21.9 \pm 0.7$ |
| $\phi_{587}$ /M-VLP (0.25 mg/ml) |                | $-4.7 \pm 1.5$                                 | $6.4 \pm 2.3$  | $21.1 \pm 1.7$ |
